# Supplementary material for: Using Zoos as Sentinels for Re-Emerging Arboviruses: Vector Surveillance during an Outbreak of Epizootic Hemorrhagic Disease at the Minnesota Zoo
Source: MDPI journal article supplement (doi:10.3390/pathogens12010140), 2023-01-14
Supplement: s1 [file s1]

**Supplementary Table S1.** Primer sequences used to detect EHDV-positive samples (EHDV-2 NS3), act as a positive control (*C. sonorensis* EF1b), and determine the serotypes of the positive pools (EHDV-1, EHDV-2, and EHDV-6 VP2).

| Gene                      | Forward Primer                        | Reverse Primer                  | Probe                                                 | Citation |
|---------------------------|---------------------------------------|---------------------------------|-------------------------------------------------------|----------|
| EHDV-2 NS3                | 5'-CTACCACAGCCGCAATTA-3'              | 5'-GCATGTAAACGAGCAAGTATT-3'     | N/A                                                   | [21]     |
| <i>C. sonorensis</i> EF1b | 5'-ATCCGTGAAGAACGTCTCAA A-3'          | 5'-CATGGCTTAAC TTCGAGGAT G-3'   | N/A                                                   | [22]     |
| EHDV-1 VP2                | 5'-GAATAATTCGYTAYGAGAAT AAARCYAAAG-3' | 5'-TCTATGYGYCTCRTCCATTCT YGG-3' | 5'-6-HEX-CAGCTGCGGTCATCTATTAG GCATC-BHQ1-3'           | [24]     |
| EHDV-2 VP2                | 5'-TATGTAAATGTATTGAATTATAC G – 3'     | 5' – TCTCATCCCGACCAACACT-3'     | 5' – 6-HEX-CTCTTCATCCGGATCCTGATATA CCTCCATC – BHQ1-3' | [24]     |
| EHDV-6 VP2                | 5'-GATTGTAATAGGAGAGATTA AG-3'         | 5'-GACCCAAAGCCGCCTGGATT -3'     | 5'-6-HEX-CGTCAAAATGTCATAACTCG GCAGATGATACC-BHQ1-3'    | [24]     |
